1 **Association between handgrip strength, handgrip strength**  
2 **asymmetry, and anxiety in Korean older adults: The**  
3 **Korean National Health and Nutrition Examination Survey**  
4 **2022**

5

6 Sang-Youn Choi <sup>1</sup>, Su-Min Park <sup>2,3\*</sup>, Eun-Cheol Park <sup>3,4\*</sup>

7

8 <sup>1</sup> Medical Course, Yonsei University College of Medicine, Seoul, Republic of Korea

9 <sup>2</sup> Department of Public Health, Graduate School, Yonsei University, Seoul, Republic of

10 Korea

11 <sup>3</sup> Institute of Health Services Research, Yonsei University, Seoul, Republic of Korea

12 <sup>4</sup> Department of Preventive Medicine, Yonsei University College of Medicine, Seoul,

13 Republic of Korea

14

15

16 **\*Corresponding author:** Su-Min Park

17 E-mail: [gemmaa3737@yuhs.ac](mailto:gemmaa3737@yuhs.ac) (SMP)

18

19 **\*Co-corresponding author:** Eun-Cheol Park

20 E-mail: [ECPARK@yuhs.ac](mailto:ECPARK@yuhs.ac) (ECP)

21

## 22 **Abstract**

23           Low handgrip strength (HGS) and HGS asymmetry are associated with age-related  
24 physical and mental disorders in older adults. This study aimed to examine the association  
25 between HGS-related factors and anxiety to evaluate whether HGS assessments can assist in  
26 identifying anxiety risk. In total, 1,750 participants from the Korea National Health and  
27 Nutrition Examination Survey of 2022 were included in this study. Individuals whose HGS  
28 values were below the 20th percentile of the study population stratified by sex were classified  
29 into the low-HGS group. Anxiety was assessed using the generalized anxiety disorder with a  
30 7-item scale. Multiple logistic regression was used to analyze the relationship between HGS  
31 level and asymmetry and anxiety, adjusting for covariates. Overall, 70 (8.7%) men and 123  
32 (13.0%) women had anxiety. Elevated odds of anxiety were observed in older women with low  
33 HGS (adjusted odds ratio: 2.17, 95% confidence interval: 1.31–3.61). There was a positive  
34 correlation between the degree of asymmetrical HGS and anxiety among women. This study  
35 found positive associations between low HGS, HGS asymmetry, and anxiety in older Korean  
36 women. This population may require specific interventions to help maintain good mental health.

37

## 38 Introduction

39 Anxiety is more common in older adults than in young people [1], and its prevalence  
40 is increasing. For example, the rates of anxiety among the United States adults increased from  
41 5.12% in 2008 to 6.68% in 2018 [2]. Meanwhile, anxiety among Brazilian adults showed a  
42 sharp increase during the COVID-19 pandemic [3].

43 Populations in which 14% and 20% of people are older than 65 years are considered  
44 an “aged” and a “super-aged” society, respectively. Korea became an aged society in 2018 and  
45 is expected to become a super-aged society by 2025, as there are currently more than 10 million  
46 people older than 65 years [4]. The prevalence of anxiety among older adults in Korea was  
47 11.0%, according to the Korea National Health and Nutrition Examination Survey (KNHANES)  
48 in 2022.

49 Anxiety in older adults is associated with increased morbidity and mortality rates [5-  
50 7]. Older adults with anxiety are at higher risk of cardiovascular disease and cognitive decline  
51 [8], necessitating specific interventions. However, anxiety symptoms in older adults are often  
52 underestimated because mental health changes tend to be attributed to physical diseases in this  
53 population [8]. Therefore, novel approaches to screening, diagnosing, and managing anxiety in  
54 older adults are required.

55 We hypothesized that sarcopenia may be a good indicator of anxiety. Sarcopenia is  
56 associated with many aging-associated diseases, such as osteoporosis, type 2 diabetes mellitus,  
57 and cardiovascular disease [9-11]. Moreover, it has been reported to contribute to depression,  
58 which is also a mental disorder related to anxiety [12, 13]. Therefore, sarcopenia may be  
59 associated with anxiety.

60 Measuring handgrip strength (HGS) is one way to diagnose sarcopenia [14]. Hence,  
61 HGS might be used as an assistant index for diagnosing anxiety if the association between the  
62 two factors is shown. Sarcopenia and low HGS are associated with aging-related diseases and  
63 depression [15-18]. Measuring HGS involves using portable devices, which makes it an  
64 accessible indicator.

65 Asymmetrical HGS may also be associated with anxiety. HGS difference between  
66 hands ranging from 0% to 10% is considered normal [19]. In contrast, an asymmetry of > 10%  
67 is associated with depression and age-related disease [20-22].

68 Some studies have found an association between HGS and age-related or mental  
69 diseases in older adults. In addition, a study of Polish older adults found that better HGS is  
70 related to a lower frequency of pain and anxiety, which was investigated using the EuroQol-  
71 5D questionnaire [23]. However, no study to date has examined the relationship between HGS-  
72 related factors and anxiety in older Koreans using the Generalized Anxiety Disorder 7-item  
73 (GAD-7), which is more specific for measuring anxiety than the EuroQol-5D questionnaire.  
74 Therefore, in this study, we aimed to explore the association between anxiety, low HGS, and  
75 HGS asymmetry in Korean older adults.

76

## 77 **Methods**

78           The data analyzed in this study were obtained from the 2022 KNHANES IX.  
79 KNHANES is a nationwide cross-sectional survey conducted by the Korea Disease Control  
80 and Prevention Agency. It assesses the health and nutritional status of Koreans, capturing  
81 variables such as obesity status, blood pressure values, and diabetes diagnosis. It is used to  
82 inform national policies and for global comparisons of health outcomes.

### 83 **Study population**

84           The GAD-7 was first included in the 2021 KNHANES. However, as the HGS was not  
85 investigated in 2021 and the survey for 2023 was not available at the time of writing, this study  
86 only used data from 2022. In total, 6,265 individuals were included in the data for 2022. A total  
87 of 4,023 individuals under the age of 60 years, and 492 individuals lacking values for study  
88 variables were excluded. Therefore, 1,750 individuals were included in the analysis.

### 89 **Variables**

90           We used the GAD-7 to select participants with anxiety. The GAD-7 comprises seven  
91 questions: participants answered each question on a scale from 0 to 3, with 0 indicating no  
92 anxiety at all and 3 indicating anxiety nearly every day. The answers to each question are  
93 summed to obtain a final score that ranges from 0 to 21. The score 0–4 indicated no anxiety,  
94 5–9 mild anxiety, 10–14 moderate anxiety, and 15–21 severe anxiety [24]. We used a threshold  
95 of 5; therefore, those with a score of 4 or lower were classified as not having anxiety and those  
96 with a score of 5 or higher were classified as having anxiety.

97           The HGS of each hand was measured twice using a digital dynamometer. Individuals  
98 with defects of the arm/hand/thumb, defects or fractures of fingers other than the thumb,  
99 paralysis of the hand, or cast or bandage of the hand/wrist were excluded from the study. The  
100 participants gripped the dynamometer for 3 s with their maximum strength in the upright  
101 position. There was a break of 60 s between the two measurements. The strongest  
102 measurements were obtained from the dominant hand. Following the criteria suggested by the  
103 Asian Working Group of Sarcopenia, we used the 20th percentile of the study population's  
104 HGS, which was stratified by sex, as a threshold: high for 20–100th percentile, and low for 0-  
105 20th percentile [25]. For additional analyses, the 10th percentile was used to divide the “low”  
106 group for comparisons between “low” and “very low” HGS. HGS asymmetry between two  
107 hands lower than 10% is considered normal. To investigate the association between the degree  
108 of asymmetry and anxiety, participants were categorized into three groups: symmetry for those  
109 with 0–10% asymmetry, moderate asymmetry for those with 10–20% asymmetry, and  
110 prominent asymmetry for those with over 20% asymmetry.

111           The data were stratified according to sex. Age (60–69, 70 years, or older), educational  
112 level (high school or lower, college or higher), working status (working or not working), area  
113 of residence (metropolitan or rural), and marital status (with or without a spouse) were included  
114 as demographic and socioeconomic factors. Obesity (body mass index  $\geq 25$  kg/m<sup>2</sup>, between  
115 18.5 and 25 kg/m<sup>2</sup>, < 18.5 kg/m<sup>2</sup>) [26], frequency of drinking (less than once a year, once a  
116 year or more), sleep duration (less than 6 h, more than 6 h per night), stress level (a lot, a little),  
117 physical activity (sufficient, insufficient), and lifetime smoking history (yes, no) were included  
118 as health-related factors. “Sufficient” or “insufficient” physical activity was defined by Aerobic  
119 Physical Activity Prevalence guidelines [27]. “Sufficient” physical activity was defined as

120 medium-intensity physical activity of more than 2.5 h per week or high-intensity physical  
121 activity of more than 1 h and 15 min per week, or both forms of activity at a total of  $\geq 2.5$  h per  
122 week, using a conversion of 1 min of high-intensity physical activity as equal to 2 min of  
123 medium-intensity physical activity. High-intensity physical activities included lifting and  
124 carrying heavy objects, digging, running, and swimming. Medium-intensity physical activities  
125 included lifting and carrying light objects, golf and jogging.

## 126 **Statistical analysis**

127 The Chi-square tests were performed to compare participant characteristics. Multiple  
128 logistic regression was used to investigate the association between HGS-related factors (low  
129 HGS and HGS asymmetry) and anxiety after considering confounding variables. Subgroup  
130 analysis stratified by each independent variable was conducted to examine the independent  
131 effects of the variables and determine any group with a high association between low HGS and  
132 anxiety. Finally, we calculated the odds ratio (OR) of anxiety in the groups with low HGS and  
133 HGS asymmetry using multiple logistic regression. For all logistic regression analyses, ORs  
134 and 95% confidence intervals (CIs) were calculated. The variance inflation factors for the  
135 variables were smaller than 1.15, indicating that there was no problem with multicollinearity.  
136 All analyses were performed using SAS software (version 9.4; SAS Institute, Cary, North  
137 Carolina, USA), and p-values  $< 0.05$  were considered statistically significant.

## 138 **Ethics statement**

139 The KCDC Research Ethics Review Committee has reviewed and approved the  
140 KNHANES annually since 2007. The KNHANES datasets are published online for research  
141 purposes. The committee operates according to the KCDC Research Ethics Review

142 Committee's standard guidelines. All survey participants filled out a consent form before  
143 participation. As this study utilized publicly available data, additional institutional review  
144 board approval was not necessary, as per Article 2.2 of the Enforcement Rule of the Bioethics  
145 and Safety Act in Korea.

## 147 Results

148 Table 1 shows the general characteristics of the study population stratified by sex. A  
 149 total of 1,750 participants, including 802 (45.8%) men and 948 (54.2%) women, were included  
 150 in the analysis. Among them, 70 (8.7%) men and 123 (13.0%) women experienced anxiety. As  
 151 the HGS threshold was the 20th percentile, 20% of participants in each sex group were  
 152 classified as having low HGS. Among participants with low HGS, 11.7% of men and 19.8%  
 153 of women had anxiety. Meanwhile, among participants with high HGS, 8.0% of men and 11.2%  
 154 of women had anxiety. The Chi-square results showed a statistically significant relationship  
 155 between low HGS and anxiety in women, but not in men.

**Table 1. Socioeconomic and health-related characteristics of all study participants according to anxiety**

| Variables                         |                      | Anxiety      |        |     |        |         |                |        |     |        |         |
|-----------------------------------|----------------------|--------------|--------|-----|--------|---------|----------------|--------|-----|--------|---------|
|                                   |                      | Male (N=802) |        |     |        |         | Female (N=948) |        |     |        |         |
|                                   |                      | NO           |        | YES |        | p-value | NO             |        | YES |        | p-value |
|                                   |                      | N            | (%)    | N   | (%)    |         | N              | (%)    | N   | (%)    |         |
| <b>Handgrip strength</b>          |                      |              |        |     |        |         |                |        |     |        |         |
|                                   | High                 | 589          | (92.0) | 51  | (8.0)  |         | 671            | (88.8) | 85  | (11.2) |         |
|                                   | Low                  | 143          | (88.3) | 19  | (11.7) |         | 154            | (80.2) | 38  | (19.8) |         |
| <b>Handgrip strength symmetry</b> |                      |              |        |     |        |         |                |        |     |        |         |
|                                   | Symmetric            | 464          | (91.3) | 44  | (8.7)  |         | 477            | (88.0) | 65  | (12.0) |         |
|                                   | Asymmetry            | 268          | (91.2) | 26  | (8.8)  |         | 348            | (85.7) | 58  | (14.3) |         |
| <b>Age</b>                        |                      |              |        |     |        |         |                |        |     |        |         |
|                                   | 60-69                | 388          | (91.3) | 37  | (8.7)  |         | 464            | (86.4) | 73  | (13.6) |         |
|                                   | 70-                  | 344          | (91.2) | 33  | (8.8)  |         | 361            | (87.8) | 50  | (12.2) |         |
| <b>Education Level</b>            |                      |              |        |     |        |         |                |        |     |        |         |
|                                   | High school or lower | 534          | (89.7) | 61  | (10.3) |         | 736            | (87.6) | 104 | (12.4) |         |
|                                   | College or higher    | 198          | (95.7) | 9   | (4.3)  |         | 89             | (82.4) | 19  | (17.6) |         |
| <b>Working state</b>              |                      |              |        |     |        |         |                |        |     |        |         |
|                                   | No                   | 354          | (91.7) | 32  | (8.3)  |         | 488            | (87.6) | 69  | (12.4) |         |
|                                   | Yes                  | 378          | (90.9) | 38  | (9.1)  |         | 337            | (86.2) | 54  | (13.8) |         |
| <b>Residence</b>                  |                      |              |        |     |        |         |                |        |     |        |         |
|                                   | Metropolitan         | 528          | (91.2) | 51  | (8.8)  |         | 611            | (88.3) | 81  | (11.7) |         |
|                                   | Rural                | 204          | (91.5) | 19  | (8.5)  |         | 214            | (83.6) | 42  | (16.4) |         |

|                          |              |     |        |    |        |        |     |        |     |        |        |
|--------------------------|--------------|-----|--------|----|--------|--------|-----|--------|-----|--------|--------|
| <b>Marital status</b>    |              |     |        |    |        | 0.374  |     |        |     |        | 0.363  |
|                          | No           | 79  | (88.8) | 10 | (11.2) |        | 276 | (83.9) | 53  | (16.1) |        |
|                          | Yes          | 653 | (91.6) | 60 | (8.4)  |        | 549 | (88.7) | 70  | (11.3) |        |
| <b>Obesity</b>           |              |     |        |    |        | 0.9395 |     |        |     |        | 0.0108 |
|                          | Underweight  | 18  | (90.0) | 2  | (10.0) |        | 16  | (66.7) | 8   | (33.3) |        |
|                          | Normal       | 464 | (91.5) | 43 | (8.5)  |        | 508 | (87.4) | 73  | (12.6) |        |
|                          | Obese        | 250 | (90.9) | 25 | (9.1)  |        | 301 | (87.8) | 42  | (12.2) |        |
| <b>Drink</b>             |              |     |        |    |        | 0.1314 |     |        |     |        | 0.153  |
|                          | No           | 209 | (88.9) | 26 | (11.1) |        | 460 | (85.7) | 77  | (14.3) |        |
|                          | Yes          | 523 | (92.2) | 44 | (7.8)  |        | 365 | (88.8) | 46  | (11.2) |        |
| <b>Sleep duration</b>    |              |     |        |    |        | 0.4911 |     |        |     |        | 0.0212 |
|                          | More than 6h | 500 | (91.7) | 45 | (8.3)  |        | 493 | (89.2) | 60  | (10.8) |        |
|                          | Less than 6h | 232 | (90.3) | 25 | (9.7)  |        | 332 | (84.1) | 63  | (15.9) |        |
| <b>Stress</b>            |              |     |        |    |        | <0.001 |     |        |     |        | <0.001 |
|                          | Low          | 241 | (99.6) | 1  | (0.4)  |        | 240 | (97.6) | 6   | (2.4)  |        |
|                          | High         | 491 | (87.7) | 69 | (12.3) |        | 585 | (83.3) | 117 | (16.7) |        |
| <b>Physical Activity</b> |              |     |        |    |        | 0.6694 |     |        |     |        | 0.7343 |
|                          | Insufficient | 441 | (90.9) | 44 | (9.1)  |        | 556 | (87.3) | 81  | (12.7) |        |
|                          | Sufficient   | 291 | (91.8) | 26 | (8.2)  |        | 269 | (86.5) | 42  | (13.5) |        |
| <b>Smoke</b>             |              |     |        |    |        | 0.6592 |     |        |     |        | 0.009  |
|                          | non-smoker   | 558 | (91.0) | 55 | (9.0)  |        | 806 | (87.5) | 115 | (12.5) |        |
|                          | Smoker       | 174 | (92.1) | 15 | (7.9)  |        | 19  | (70.4) | 8   | (29.6) |        |
| <b>Total</b>             |              | 732 | (91.3) | 70 | (8.7)  |        | 825 | (87.0) | 123 | (13.0) |        |

Variables are presented as numbers and percentages.

156

157 Table 2 shows the results of multiple logistic regression analysis between HGS and  
 158 anxiety. After adjusting for covariates, the risk of having anxiety was significantly higher  
 159 among women who had low HGS (adjusted OR [aOR]: 1.22, 95% CI: 0.62–2.43 in men, aOR:  
 160 2.17, 95% CI: 1.31–3.61 in women). Additionally, the likelihood of having anxiety was  
 161 increased among highly educated men (aOR: 3.24, 95% CI: 1.11–9.50). Among women, the  
 162 ORs of having anxiety were increased in those living in rural areas, unmarried individuals, and  
 163 those experiencing higher stress levels.

164

**Table 2. Association between handgrip strength and anxiety**

| Variables | Male    | Female  |
|-----------|---------|---------|
|           | Anxiety | Anxiety |

|                          |                      | Adjusted OR | 95% CI |   |         | Adjusted OR | 95% CI |   |        |
|--------------------------|----------------------|-------------|--------|---|---------|-------------|--------|---|--------|
| <b>Handgrip strength</b> |                      |             |        |   |         |             |        |   |        |
|                          | High                 | 1.00        |        |   |         | 1.00        |        |   |        |
|                          | Low                  | 1.22        | (0.62  | - | 2.43)   | 2.17        | (1.31  | - | 3.61)  |
| <b>Age</b>               |                      |             |        |   |         |             |        |   |        |
|                          | 60-69                | 1.00        |        |   |         | 1.00        |        |   |        |
|                          | 70-                  | 0.82        | (0.41  | - | 1.62)   | 0.59        | (0.34  | - | 1.04)  |
| <b>Education Level</b>   |                      |             |        |   |         |             |        |   |        |
|                          | High school or lower | 1.00        |        |   |         | 1.00        |        |   |        |
|                          | College or higher    | 3.24        | (1.11  | - | 9.50)   | 0.55        | (0.29  | - | 1.07)  |
| <b>Working state</b>     |                      |             |        |   |         |             |        |   |        |
|                          | No                   | 0.81        | (0.41  | - | 1.61)   | 0.77        | (0.47  | - | 1.26)  |
|                          | Yes                  | 1.00        |        |   |         | 1.00        |        |   |        |
| <b>Residence</b>         |                      |             |        |   |         |             |        |   |        |
|                          | Metropolitan         | 1.00        |        |   |         | 1.00        |        |   |        |
|                          | Rural                | 1.05        | (0.55  | - | 2.00)   | 2.55        | (1.55  | - | 4.19)  |
| <b>Marital status</b>    |                      |             |        |   |         |             |        |   |        |
|                          | No                   | 1.56        | (0.62  | - | 3.91)   | 2.48        | (1.54  | - | 3.99)  |
|                          | Yes                  | 1.00        |        |   |         | 1.00        |        |   |        |
| <b>Obesity</b>           |                      |             |        |   |         |             |        |   |        |
|                          | Underweight          | 1.32        | (0.32  | - | 5.45)   | 2.36        | (0.90  | - | 6.19)  |
|                          | Normal               | 1.00        |        |   |         | 1.00        |        |   |        |
|                          | Obese                | 1.11        | (0.59  | - | 2.08)   | 0.90        | (0.56  | - | 1.44)  |
| <b>Drink</b>             |                      |             |        |   |         |             |        |   |        |
|                          | No                   | 1.00        |        |   |         | 1.00        |        |   |        |
|                          | Yes                  | 0.75        | (0.40  | - | 1.42)   | 0.87        | (0.49  | - | 1.57)  |
| <b>Sleep duration</b>    |                      |             |        |   |         |             |        |   |        |
|                          | More than 6h         | 1.00        |        |   |         | 1.00        |        |   |        |
|                          | Less than 6h         | 0.91        | (0.48  | - | 1.75)   | 1.30        | (0.80  | - | 2.12)  |
| <b>Stress</b>            |                      |             |        |   |         |             |        |   |        |
|                          | Low                  | 1.00        |        |   |         | 1.00        |        |   |        |
|                          | High                 | 47.92       | (6.28  | - | 365.66) | 10.14       | (4.09  | - | 25.17) |
| <b>Physical Activity</b> |                      |             |        |   |         |             |        |   |        |
|                          | insufficient         | 1.21        | (0.59  | - | 2.48)   | 0.88        | (0.50  | - | 1.55)  |
|                          | sufficient           | 1.00        |        |   |         | 1.00        |        |   |        |
| <b>Smoke</b>             |                      |             |        |   |         |             |        |   |        |
|                          | non-smoker           | 1.00        |        |   |         | 1.00        |        |   |        |
|                          | smoker               | 0.60        | (0.28  | - | 1.29)   | 0.95        | (0.32  | - | 2.77)  |

165

166

167

168

169

170

The results of the subgroup analyses are presented in Table 3. After categorizing the participants by HGS level (high vs. low), no statistically significant differences were found in any male subgroup, in contrast to female subgroups. These results show trends similar to those of the main results (Table 2). The female subgroups with a significantly higher aOR for “having anxiety” and “having low HGS” included those aged 70 years and older, with a high school

171 education or lower, both employed or unemployed, married, non-drinkers, those sleeping more  
 172 than 6 h per night, those with high stress, both physically active and inactive individuals, and  
 173 non-smokers.  
 174

**Table 3. Subgroup analysis of the relationship between handgrip strength and anxiety**

| Variables                |                      | Male        |             |        |   |       | Female      |             |        |   |        |
|--------------------------|----------------------|-------------|-------------|--------|---|-------|-------------|-------------|--------|---|--------|
|                          |                      | High HGS    | Low HGS     |        |   |       | High HGS    | Low HGS     |        |   |        |
|                          |                      |             | Anxiety     |        |   |       |             | Anxiety     |        |   |        |
|                          |                      | Adjusted OR | Adjusted OR | 95% CI |   |       | Adjusted OR | Adjusted OR | 95% CI |   |        |
| <b>Age</b>               |                      |             |             |        |   |       |             |             |        |   |        |
|                          | 60-69                | 1.00        | 0.75        | (0.19  | - | 2.88) | 1.00        | 2.16        | (1.00  | - | 4.70)  |
|                          | 70-                  | 1.00        | 1.72        | (0.68  | - | 4.34) | 1.00        | 2.20        | (1.01  | - | 4.79)  |
| <b>Education Level</b>   |                      |             |             |        |   |       |             |             |        |   |        |
|                          | High school or lower | 1.00        | 1.58        | (0.78  | - | 3.12) | 1.00        | 2.06        | (1.22  | - | 3.47)  |
|                          | College or higher    | 1.00        | -           | -      | - | -     | 1.00        | 3.41        | (0.70  | - | 16.64) |
| <b>Working state</b>     |                      |             |             |        |   |       |             |             |        |   |        |
|                          | No                   | 1.00        | 1.24        | (0.48  | - | 3.24) | 1.00        | 2.04        | (1.03  | - | 4.04)  |
|                          | Yes                  | 1.00        | 0.86        | (0.28  | - | 2.63) | 1.00        | 2.99        | (1.11  | - | 8.09)  |
| <b>Residence</b>         |                      |             |             |        |   |       |             |             |        |   |        |
|                          | Metropolitan         | 1.00        | 0.75        | (0.31  | - | 1.80) | 1.00        | 1.92        | (0.98  | - | 3.78)  |
|                          | Rural                | 1.00        | 3.20        | (1.19  | - | 8.57) | 1.00        | 2.54        | (0.92  | - | 6.98)  |
| <b>Marital status</b>    |                      |             |             |        |   |       |             |             |        |   |        |
|                          | No                   | 1.00        | 0.34        | (0.03  | - | 3.77) | 1.00        | 1.96        | (0.93  | - | 4.13)  |
|                          | Yes                  | 1.00        | 1.42        | (0.66  | - | 3.07) | 1.00        | 2.48        | (1.16  | - | 5.29)  |
| <b>Obesity</b>           |                      |             |             |        |   |       |             |             |        |   |        |
|                          | Underweight          | 1.00        | -           | -      | - | -     | 1.00        | -           | -      | - | -      |
|                          | Normal               | 1.00        | 1.63        | (0.72  | - | 3.71) | 1.00        | 2.02        | (0.97  | - | 4.21)  |
|                          | Obese                | 1.00        | 0.64        | (0.13  | - | 3.20) | 1.00        | 2.45        | (0.94  | - | 6.38)  |
| <b>Drink</b>             |                      |             |             |        |   |       |             |             |        |   |        |
|                          | No                   | 1.00        | 1.58        | (0.45  | - | 5.50) | 1.00        | 2.44        | (1.20  | - | 4.95)  |
|                          | Yes                  | 1.00        | 1.05        | (0.43  | - | 2.61) | 1.00        | 1.80        | (0.71  | - | 4.57)  |
| <b>Sleep duration</b>    |                      |             |             |        |   |       |             |             |        |   |        |
|                          | More than 6h         | 1.00        | 1.04        | (0.40  | - | 2.72) | 1.00        | 2.34        | (1.15  | - | 4.76)  |
|                          | Less than 6h         | 1.00        | 1.23        | (0.42  | - | 3.55) | 1.00        | 1.94        | (0.91  | - | 4.14)  |
| <b>Stress</b>            |                      |             |             |        |   |       |             |             |        |   |        |
|                          | Low                  | 1.00        | -           | -      | - | -     | 1.00        | 4.83        | (0.94  | - | 24.73) |
|                          | High                 | 1.00        | 1.16        | (0.57  | - | 2.33) | 1.00        | 2.04        | (1.19  | - | 3.50)  |
| <b>Physical Activity</b> |                      |             |             |        |   |       |             |             |        |   |        |
|                          | insufficient         | 1.00        | 1.08        | (0.49  | - | 2.39) | 1.00        | 2.07        | (1.11  | - | 3.89)  |
|                          | sufficient           | 1.00        | 1.89        | (0.58  | - | 6.21) | 1.00        | 2.88        | (1.21  | - | 6.83)  |
| <b>Smoke</b>             |                      |             |             |        |   |       |             |             |        |   |        |
|                          | non-smoker           | 1.00        | 1.18        | (0.54  | - | 2.56) | 1.00        | 2.18        | (1.30  | - | 3.65)  |
|                          | smoker               | 1.00        | 1.29        | (0.27  | - | 6.28) | 1.00        | -           | -      | - | -      |

175

176 After subgrouping individuals according to the 10th and 20th HGS percentiles (very  
 177 low for 0–10% HGS, low for 10–20% HGS, and high for > 20% HGS), we conducted multiple  
 178 logistic regression analysis using the high group as a reference. To examine the association  
 179 between HGS asymmetry and anxiety, participants were categorized into three groups by a  
 180 threshold of 10% and 20% asymmetry, and multiple logistic regression analyses were  
 181 performed using the symmetry group as a reference. The results of these two analyses are  
 182 presented in Table 4. No effects were observed among men. However, among women, the very  
 183 low HGS group had significantly higher odds of anxiety compared to the high HGS group  
 184 (aOR: 3.22, 95% CI: 1.67–6.20). There was also a positive correlation between lower HGS and  
 185 higher odds of anxiety (aOR for low HGS group: 1.46, aOR for very low HGS group: 3.22). A  
 186 similar correlation was observed in women’s HGS asymmetry: The more severe the HGS  
 187 asymmetry, the higher the odds of anxiety (aOR for the moderate HGS asymmetry group: 1.37;  
 188 aOR for the prominent HGS asymmetry group: 1.83).

189

**Table 4. Association between HGS-related factors and anxiety**

| Variables |                                    | GAD-7 ≥ 5   |        |   |       |
|-----------|------------------------------------|-------------|--------|---|-------|
|           |                                    | Adjusted OR | 95% CI |   |       |
| Male      | <b>Handgrip strength</b>           |             |        |   |       |
|           | High                               | 1.00        |        |   |       |
|           | Low                                | 1.03        | (0.39  | - | 2.68) |
|           | Very low                           | 1.47        | (0.62  | - | 3.53) |
|           | <b>Handgrip strength asymmetry</b> |             |        |   |       |
|           | Symmetry                           | 1.00        |        |   |       |
|           | Moderate asymmetry                 | 1.51        | (0.75  | - | 3.07) |
|           | Prominent asymmetry                | 0.95        | (0.38  | - | 2.38) |
| Female    | <b>Handgrip strength</b>           |             |        |   |       |

|  |                                    |      |       |   |       |
|--|------------------------------------|------|-------|---|-------|
|  | High                               | 1.00 |       |   |       |
|  | Low                                | 1.46 | (0.69 | - | 3.08) |
|  | Very low                           | 3.22 | (1.67 | - | 6.20) |
|  | <b>Handgrip strength asymmetry</b> |      |       |   |       |
|  | Symmetry                           | 1.00 |       |   |       |
|  | Moderate asymmetry                 | 1.37 | (0.83 | - | 2.27) |
|  | Prominent asymmetry                | 1.83 | (0.90 | - | 3.72) |

190

191 Table 5 shows the results of multiple logistic regression analysis for the effects of HGS  
 192 and HGS asymmetry on anxiety. No effect was observed among men. Among women, the  
 193 group with “low HGS and moderate asymmetry” (aOR: 2.98, 95% CI: 1.49–5.94) and that with  
 194 “low HGS and prominent asymmetry” (aOR: 3.16, 95% CI: 1.37–7.29) had higher a odds of  
 195 having anxiety. The odds of anxiety increased as the degree of asymmetry increased and HGS  
 196 became lower among women.

197

**Table 5. Effects of HGS and HGS asymmetry on anxiety**

| Variables |          | GAD-7 ≥ 5   |        |   |                    |             |        |                     |       |             |        |   |       |
|-----------|----------|-------------|--------|---|--------------------|-------------|--------|---------------------|-------|-------------|--------|---|-------|
|           |          | Symmetry    |        |   | Moderate asymmetry |             |        | Prominent asymmetry |       |             |        |   |       |
|           |          | Adjusted OR | 95% CI |   |                    | Adjusted OR | 95% CI |                     |       | Adjusted OR | 95% CI |   |       |
| Male      | High HGS | 1.00        |        |   |                    | 1.588       | (0.70  | -                   | 3.62) | 0.602       | (0.13  | - | 2.87) |
|           | Low HGS  | 1.158       | (0.45  | - | 3.00)              | 1.439       | (0.44  | -                   | 4.70) | 1.983       | (0.56  | - | 7.00) |
| Female    | High HGS | 1.00        |        |   |                    | 1.121       | (0.60  | -                   | 2.10) | 1.366       | (0.49  | - | 3.83) |
|           | Low HGS  | 1.478       | (0.61  | - | 3.60)              | 2.978       | (1.49  | -                   | 5.94) | 3.157       | (1.37  | - | 7.29) |

198

199

## 200 **Discussion**

201 In this study, we found that a low HGS was significantly associated with a higher odds  
202 of anxiety among older Korean women. Furthermore, we found a positive correlation between  
203 the degree of HGS asymmetry and risk of anxiety in women.

204 A previous study showed that high HGS was related to a lower prevalence of pain and  
205 anxiety in older Polish adults [23]. Our results generally agree with those of this previous study.  
206 However, our results were different from those of previous studies, showing significant effects  
207 among women but not among men. Population-level and methodological differences may  
208 account for these discrepancies.

209 Another previous study showed that the weaker the HGS in older Korean women, the  
210 higher the risk of depression, while no significant association was found in men [28]. A  
211 previous study has shown an association between anxiety and depression [29, 30]. Combining  
212 these two results, we can infer that there is an association between low HGS and anxiety,  
213 specifically in women. The results of this study are consistent with this inference.

214 Although the mechanism by which low HGS is associated with anxiety remains  
215 unclear, we proposed the following explanation: older individuals with low HGS were more  
216 likely to have poor physical function. A low HGS is associated with upper limb disability in  
217 women with bilateral idiopathic carpal tunnel syndrome [31]. Older people with low physical  
218 function may be unable to get out of their beds, restricting their ability to engage in the activities  
219 of daily living, which would reduce their quality of life. Low HGS is associated with poor  
220 quality of life in cancer survivors [32]. Poor quality of life and functional impairment can lead  
221 to anxiety [33]. Anxiety may also contribute to a low HGS. Individuals with anxiety are more

222 likely to experience sleep deprivation, which induces muscle loss and impairs regeneration [34,  
223 35].

224 Women appeared to have a greater inclination to experience anxiety due to low HGS  
225 compared to men. The 20th percentile HGS threshold for HGS in men (30.0 kg) is the 95th  
226 percentile of HGS in women. As low HGS for a man is high HGS for a woman, a man with  
227 low HGS may retain sufficient power to engage in daily activities, which would reduce his risk  
228 of anxiety. Men may also have a greater margin for HGS decline before experiencing the effects  
229 of weakness, compared to women. In addition, women are more likely to experience anxiety  
230 than men [36, 37]. Therefore, they can be easily affected by factors that cause anxiety.

231 Similar to low HGS, HGS asymmetry was associated with anxiety only in women. A  
232 possible reason for this association is as follows. HGS asymmetry can contribute to functional  
233 disability [38]. Functional disabilities can lead to anxiety [33]. Therefore, HGS asymmetry may  
234 lead to anxiety. The reason men did not show significant results in the HGS asymmetry analysis  
235 might be the same as that behind the results of the low HGS analysis. As men have lower odds  
236 of experiencing anxiety than women, they are less sensitive to factors contributing to anxiety.

237 In this study, women with “low HGS and moderate asymmetry” and “low HGS and  
238 prominent asymmetry” had increased odds of having anxiety. Tables 2 and 4 showed that the  
239 aOR for anxiety among groups were as follows: 2.173 for the low HGS group, 1.374 for the  
240 moderate symmetry group, and 1.829 for the prominent asymmetry group. The former aORs  
241 are higher than the latter aORs. Therefore, older women with low HGS and HGS asymmetry  
242 may require screening for anxiety.

243 This study had some limitations. First, the data were insufficient to capture details. For  
244 example, there were 542 women with a high school education level or lower, and 108 women

245 with a college education level or higher, representing approximately one-fifth of the former  
246 group. Although aOR for the college or higher group (aOR: 3.41, 95% CI: 0.70–16.64) was  
247 higher than that of the high school or lower group (aOR: 2.06, 95% CI: 1.22–3.47), there was  
248 no statistical significance in the college or higher group, while there was statistical significance  
249 in the high school or lower group, according to the subgroup analysis for education level (Table  
250 3). Statistical significance in college or higher group might have been found if there were  
251 enough participants in that group. In addition, we found a positive correlation between the  
252 degree of asymmetry and the risk of anxiety (Table 4); however, this effect was non-significant  
253 likely because of limited data. We also conducted a subgroup analysis to examine the  
254 association between low HGS and anxiety disorder severity. However, as only 21 men and 43  
255 women had moderate or severe anxiety, the range of the 95% CI was too wide, and we were  
256 unable to find any significant effects. Therefore, we did not use this table in this study. Second,  
257 because a cross-sectional design was used, we could not prove whether there was a causal  
258 relationship between low HGS and anxiety. It is possible that low HGS caused anxiety.  
259 However, reverse causality and no causality are plausible. Third, some variables used in  
260 multiple logistic regression analyses, such as physical activity and smoking, were surveyed  
261 through self-reported questionnaires, which were not validated, potentially reducing the  
262 accuracy of the presented estimates. Finally, as this study included only South Korean  
263 participants, the results may not apply to other countries and contexts.

264 Measuring HGS is an easy, cost-effective, and noninvasive method for examining  
265 sarcopenia in older adults. Few studies have identified an association between low HGS and  
266 mental health outcomes. To date, only one study has examined the correlation between low  
267 HGS and anxiety. However, the study measured anxiety not by the GAD-7 but by the EuroQol-

268 5D questionnaire and did not examine the correlation between the degree of HGS asymmetry  
269 and the risk of anxiety [23]. Anxiety disorders in older adults can result in morbidity and  
270 mortality; therefore, it is important that older women with low HGS who are more susceptible  
271 to anxiety be monitored.

272

## 273 **Conclusion**

274           This study's findings revealed that low HGS can increase the risk of anxiety in older  
275 Korean women. In addition, our findings revealed a positive correlation between the degree of  
276 HGS asymmetry and the risks of anxiety in older women, suggesting a need for targeted  
277 interventions, which may include public health campaigns promoting exercise to improve HGS.  
278 However, we could not examine the association between low HGS and anxiety severity due to  
279 the limited number of participants. Further studies with larger sample sizes are required to  
280 determine the association between these two factors. In addition, we used Korea's cross-  
281 sectional data in this study; further studies are needed to infer causality and identify  
282 associations in other ethnic groups.

283

## 284 **Acknowledgments**

285           This study used data from the ninth KNHANES, 2022, KCDC. We would like to thank  
286 Editage ([www.editage.co.kr](http://www.editage.co.kr)) for English language editing.

287

## 288 Reference

- 289 1. Kirmizioglu Y, Doğan O, Kuğu N, Akyüz G. Prevalence of anxiety disorders among elderly  
290 people. *International Journal of Geriatric Psychiatry: A journal of the psychiatry of late life and allied*  
291 *sciences*. 2009;24(9):1026-33.
- 292 2. Goodwin RD, Weinberger AH, Kim JH, Wu M, Galea S. Trends in anxiety among adults in  
293 the United States, 2008–2018: Rapid increases among young adults. *Journal of psychiatric research*.  
294 2020;130:441-6.
- 295 3. Feter N, Caputo E, Doring I, Leite J, Cassuriaga J, Reichert F, et al. Sharp increase in  
296 depression and anxiety among Brazilian adults during the COVID-19 pandemic: findings from the  
297 PAMPA cohort. *Public health*. 2021;190:101-7.
- 298 4. Kim B-R, Hwang H-H. Analysis of major factors affecting the quality of life of the Elderly in  
299 Korea in Preparation for a Super-aged Society. *International Journal of Environmental Research and*  
300 *Public Health*. 2022;19(15):9618.
- 301 5. Van Hout HP, Beekman AT, De Beurs E, Comijs H, Van Marwijk H, De Haan M, et al. Anxiety  
302 and the risk of death in older men and women. *The British Journal of Psychiatry*. 2004;185(5):399-  
303 404.
- 304 6. Schoevers RA, Beekman AT, Deeg D, Jonker C, Tilburg Wv. Comorbidity and risk-patterns  
305 of depression, generalised anxiety disorder and mixed anxiety-depression in later life: results from

- 306 the AMSTEL study. *International journal of geriatric psychiatry*. 2003;18(11):994-1001.
- 307 7. Carriere I, Ryan J, Norton J, Scali J, Stewart R, Ritchie K, et al. Anxiety and mortality risk in  
308 community-dwelling elderly people. *The british journal of psychiatry*. 2013;203(4):303-9.
- 309 8. Andreescu C, Lee S. Anxiety disorders in the elderly. *Anxiety disorders: Rethinking and*  
310 *understanding recent discoveries*. 2020:561-76.
- 311 9. Lee D-Y, Shin S. Association of sarcopenia with osteopenia and osteoporosis in community-  
312 dwelling older Korean adults: A cross-sectional study. *Journal of Clinical Medicine*. 2021;11(1):129.
- 313 10. Mesinovic J, Zengin A, De Courten B, Ebeling PR, Scott D. Sarcopenia and type 2 diabetes  
314 mellitus: a bidirectional relationship. *Diabetes, metabolic syndrome and obesity: targets and therapy*.  
315 2019:1057-72.
- 316 11. Damluji AA, Alfaraidhy M, AlHajri N, Rohant NN, Kumar M, Al Malouf C, et al. Sarcopenia  
317 and cardiovascular diseases. *Circulation*. 2023;147(20):1534-53.
- 318 12. Li Z, Liu B, Tong X, Ma Y, Bao T, Yue J, et al. The association between sarcopenia and  
319 incident of depressive symptoms: a prospective cohort study. *BMC geriatrics*. 2024;24(1):74.
- 320 13. Lee J-D, Lee J-H. Association between Possible Sarcopenia and Depressive Symptoms in  
321 Korean Older Adults: Results from the Korea National Health and Nutrition Examination Survey in  
322 2018. *Korean Journal of Family Medicine*. 2023;44(3):143.
- 323 14. Lee SH, Gong HS. Measurement and interpretation of handgrip strength for research on  
324 sarcopenia and osteoporosis. *Journal of bone metabolism*. 2020;27(2):85.

- 325 15. Brooks JM, Titus A, Bruce M, Orzechowski N, Mackenzie T, Bartels S, et al. Depression and  
326 Handgrip Strength Among US Adults Aged 60 Years and Older from NHANES 2011–2014. The  
327 Journal of nutrition, health and aging. 2018;22(8):938-43.
- 328 16. Ling CH, Taekema D, De Craen AJ, Gussekloo J, Westendorp RG, Maier AB. Handgrip  
329 strength and mortality in the oldest old population: the Leiden 85-plus study. Cmaj. 2010;182(5):429-  
330 35.
- 331 17. Kim KH, Park SK, Lee DR, Lee J. The relationship between handgrip strength and cognitive  
332 function in elderly Koreans over 8 years: a prospective population-based study using Korean  
333 longitudinal study of ageing. Korean journal of family medicine. 2018;40(1):9-15.
- 334 18. Han K-M, Chang J, Yoon H-K, Ko Y-H, Ham B-J, Kim Y-K, et al. Relationships between hand-  
335 grip strength, socioeconomic status, and depressive symptoms in community-dwelling older adults.  
336 Journal of affective disorders. 2019;252:263-70.
- 337 19. Armstrong C, Oldham JA. A comparison of dominant and non-dominant hand strengths.  
338 Journal of Hand Surgery. 1999;24(4):421-5.
- 339 20. Song Q, Shu X, Zhao Y, Ge N, Yue J. Association of handgrip strength asymmetry and  
340 weakness with depression among middle-aged and older population in China: A cohort study.  
341 Journal of Affective Disorders. 2024;363:401-8.
- 342 21. Lin S, Wang F, Huang Y, Yuan Y, Huang F, Zhu P. Handgrip strength weakness and  
343 asymmetry together are associated with cardiovascular outcomes in older outpatients: A prospective

- 344 cohort study. *Geriatrics & Gerontology International*. 2022;22(9):759-65.
- 345 22. McGrath R, Tomkinson GR, LaRoche DP, Vincent BM, Bond CW, Hackney KJ. Handgrip  
346 strength asymmetry and weakness may accelerate time to mortality in aging Americans. *Journal of*  
347 *the American Medical Directors Association*. 2020;21(12):2003-7. e1.
- 348 23. Sosowska N, Guligowska A, Sołtysik B, Borowiak E, Kostka T, Kostka J. Better handgrip  
349 strength is related to the lower prevalence of pain and anxiety in community-dwelling older adults.  
350 *Journal of Clinical Medicine*. 2023;12(11):3846.
- 351 24. Spitzer RL, Kroenke K, Williams JB, Löwe B. A brief measure for assessing generalized anxiety  
352 disorder: the GAD-7. *Archives of Internal Medicine*. 2006;166(10):1092-7.
- 353 25. Chen L-K, Liu L-K, Woo J, Assantachai P, Auyeung T-W, Bahyah KS, et al. Sarcopenia in  
354 Asia: consensus report of the Asian Working Group for Sarcopenia. *Journal of the American Medical*  
355 *Directors Association*. 2014;15(2):95-101.
- 356 26. Purnell JQ. Definitions, classification, and epidemiology of obesity. 2015.
- 357 27. KDCA. Trends in Prevalence of Aerobic Physical Activity, 2014-2022. The Korea Disease  
358 Control and Prevention Agency; 2024. Report No.: 2005-811X 2586-0860 Contract No.: 11.
- 359 28. Hurh K, Park Y, Kim GR, Jang S-I, Park E-C. Associations of handgrip strength and handgrip  
360 strength asymmetry with depression in the elderly in Korea: a cross-sectional study. *Journal of*  
361 *Preventive Medicine and Public Health*. 2020;54(1):63-72.
- 362 29. Kalin NH. The critical relationship between anxiety and depression. *Am Psychiatric Assoc*;

363 2020. p. 365-7.

364 30. Hetteema JM, editor What is the genetic relationship between anxiety and depression?

365 American journal of medical genetics part C: Seminars in medical genetics; 2008: Wiley Online

366 Library.

367 31. Yoshida A, Kurimoto S, Iwatsuki K, Saeki M, Nishizuka T, Nakano T, et al. Upper extremity

368 disability is associated with pain intensity and grip strength in women with bilateral idiopathic carpal

369 tunnel syndrome. *NeuroRehabilitation*. 2019;44(2):199-205.

370 32. Kim H, Yoo S, Kim H, Park SG, Son M. Cancer survivors with low hand grip strength have

371 decreased quality of life compared with healthy controls: The Korea National Health and Nutrition

372 Examination Survey 2014–2017. *Korean journal of family medicine*. 2021;42(3):204.

373 33. De Waal M, Arnold I, Eekhof J, van Hemert A. Somatoform disorders in general practice:

374 prevalence, functional limitations and comorbidity with anxiety and depression. *Nederlands*

375 *tijdschrift voor geneeskunde*. 2006;150(12):671-6.

376 34. Dattilo M, Antunes HKM, Medeiros A, Mônico-neto M, Souza HdS, Lee KS, et al. Paradoxical

377 sleep deprivation induces muscle atrophy. *Muscle & nerve*. 2012;45(3):431-3.

378 35. Mônico-Neto M, Dáttilo M, Ribeiro DA, Lee KS, de Mello MT, Tufik S, et al. REM sleep

379 deprivation impairs muscle regeneration in rats. *Growth Factors*. 2017;35(1):12-8.

380 36. Grenier S, Payette MC, Gunther B, Askari S, Desjardins FF, Raymond B, et al. Association of

381 age and gender with anxiety disorders in older adults: A systematic review and meta-analysis.

382 International journal of geriatric psychiatry. 2019;34(3):397-407.

383 37. McLean CP, Asnaani A, Litz BT, Hofmann SG. Gender differences in anxiety disorders:  
384 prevalence, course of illness, comorbidity and burden of illness. Journal of psychiatric research.  
385 2011;45(8):1027-35.

386 38. McGrath R, Vincent BM, Jurivich DA, Hackney KJ, Tomkinson GR, Dahl LJ, et al. Handgrip  
387 strength asymmetry and weakness together are associated with functional disability in aging  
388 Americans. The Journals of Gerontology: Series A. 2021;76(2):291-6.

389
